# Supplementary material
Source: PubMed Central journal article supplement (PMC8940772)
Supplement: mmc1-suppl.pdf [file mmc1-suppl.pdf]

## Supplemental Information

### **COMPARE analysis, a bioinformatic approach to accelerate drug repurposing against Covid-19 and other emerging epidemics**

**Imad Naasani<sup>1</sup>**

<sup>1</sup>Nanoco Life Sciences, Nanoco Technologies, Ltd., Manchester, United Kingdom.

#### **Correspondence**

Imad Naasani, PhD. Nanoco Life Sciences, Nanoco Technologies, Ltd., Manchester M13 9NT, United Kingdom.

Email: [inaasani@nanocotechnologies.com](mailto:inaasani@nanocotechnologies.com)

Lists of correlated “fished” compounds extracted using COMPARE algorithm after seeding compounds with ostensible anti SARS-CoV-2 effects

Suppl. Table 1- List of compounds correlated to Chloroquine. Highlighted rows indicate drugs that are approved or in clinical development

| pearsonCo | spearman | rank | correlation | seed iden | target iden | seed descri | target desc | count | com | seed multi | seed genes | seed provi | seed probe | seed miR | Seed SMLI | seed nsc | seed logH | seed endpi | seed target | target mol | target prov | target gen | target prot | target miR  | Target SMI | target nsc | target logH | target end                                       | target target |
|-----------|----------|------|-------------|-----------|-------------|-------------|-------------|-------|-----|------------|------------|------------|------------|----------|-----------|----------|-----------|------------|-------------|------------|-------------|------------|-------------|-------------|------------|------------|-------------|--------------------------------------------------|---------------|
| 1         | 1        | 1    | 1           | NSC_14C   | NSC_14C     | NSC_14C     | NSC_14C     | 14050 |     |            |            |            |            |          | CCN(CC)CC | 14050    | -4        | G150       |             |            |             |            |             |             | CCN(CC)CC  | 14050      | -4          | G150                                             |               |
| 0.69      | 0.75     | 2    | 0.69        | NSC_14C   | NSC_14C     | NSC_624     | NSC_1405    | 50    |     |            |            |            |            |          | CCN(CC)CC | 14050    | -4        | G150       |             |            |             |            |             | CCN(CC)CC   | 14050      | -4         | G150        |                                                  |               |
| 0.68      | 0.66     | 3    | 0.68        | NSC_14C   | NSC_14C     | NSC_670     | NSC_1405    | 57    |     |            |            |            |            |          | CCN(CC)CC | 14050    | -4        | G150       |             |            |             |            |             | CN(C)CCOC   | 670226     | -4         | G150        |                                                  |               |
| 0.68      | 0.73     | 4    | 0.68        | NSC_14C   | NSC_14C     | NSC_166     | NSC_1405    | 51    |     |            |            |            |            |          | CCN(CC)CC | 14050    | -4        | G150       |             |            |             |            |             | FC(F)F)c1c  | 169877     | -4         | G150        |                                                  |               |
| 0.66      | 0.67     | 5    | 0.66        | NSC_14C   | NSC_14C     | NSC_706     | NSC_1405    | 57    |     |            |            |            |            |          | CCN(CC)CC | 14050    | -4        | G150       |             |            |             |            |             | CNCCCNC1    | 708074     | -4         | G150        |                                                  |               |
| 0.66      | 0.63     | 6    | 0.66        | NSC_14C   | NSC_14C     | NSC_670     | NSC_1405    | 55    |     |            |            |            |            |          | CCN(CC)CC | 14050    | -4        | G150       |             |            |             |            |             | CN(C)CCOC   | 670229     | -4         | G150        |                                                  |               |
| 0.65      | 0.65     | 7    | 0.65        | NSC_14C   | NSC_14C     | NSC_670     | NSC_1405    | 55    |     |            |            |            |            |          | CCN(CC)CC | 14050    | -4        | G150       |             |            |             |            |             | CN(C)CCO    | 670225     | -4         | G150        |                                                  |               |
| 0.64      | 0.55     | 8    | 0.64        | NSC_14C   | NSC_14C     | NSC_670     | NSC_1405    | 57    |     |            |            |            |            |          | CCN(CC)CC | 14050    | -4        | G150       |             |            |             |            |             | COc1cc2C    | 676002     | -4         | G150        |                                                  |               |
| 0.62      | 0.49     | 9    | 0.62        | NSC_14C   | NSC_14C     | NSC_134     | NSC_1405    | 51    |     |            |            |            |            |          | CCN(CC)CC | 14050    | -4        | G150       |             |            |             |            |             | COc1cc2CC   | 134759     | -4         | G150        |                                                  |               |
| 0.62      | 0.65     | 10   | 0.62        | NSC_14C   | NSC_14C     | NSC_628     | NSC_1405    | 49    |     |            |            |            |            |          | CCN(CC)CC | 14050    | -4        | G150       |             |            |             |            |             | CCOC(=O)N   | 628303     | -4         | G150        |                                                  |               |
| 0.62      | 0.64     | 11   | 0.62        | NSC_14C   | NSC_14C     | NSC_381     | NSC_1405    | 52    |     |            |            |            |            |          | CCN(CC)CC | 14050    | -4        | G150       |             |            |             |            |             | CC(O)CN(C   | 38114      | -4         | G150        |                                                  |               |
| 0.61      | 0.58     | 12   | 0.61        | NSC_14C   | NSC_14C     | NSC_745     | NSC_1405    | 54    |     |            |            |            |            |          | CCN(CC)CC | 14050    | -4        | G150       |             |            |             |            |             | CN(CCCN1    | 743058     | -4         | G150        |                                                  |               |
| 0.61      | 0.61     | 13   | 0.61        | NSC_14C   | NSC_14C     | NSC_715     | NSC_1405    | 56    |     |            |            |            |            |          | CCN(CC)CC | 14050    | -4        | G150       |             |            |             |            |             | CC(C)(C)Si  | 715470     | -4         | G150        |                                                  |               |
| 0.61      | 0.58     | 14   | 0.61        | NSC_14C   | NSC_14C     | NSC_716     | NSC_1405    | 57    |     |            |            |            |            |          | CCN(CC)CC | 14050    | -4        | G150       |             |            |             |            |             | Nc1c2CCc    | 716850     | -4         | G150        |                                                  |               |
| 0.61      | 0.73     | 15   | 0.61        | NSC_14C   | NSC_14C     | NSC_141     | NSC_1405    | 52    |     |            |            |            |            |          | CCN(CC)CC | 14050    | -4        | G150       |             |            |             |            |             | CC1=NCCc    | 141527     | -3.3       | G150        |                                                  |               |
| 0.6       | 0.63     | 16   | 0.6         | NSC_14C   | NSC_14C     | NSC_367     | NSC_1405    | 55    |     |            |            |            |            |          | CCN(CC)CC | 14050    | -4        | G150       |             |            |             |            |             | CCCCCCC1    | 36704      | -4         | G150        |                                                  |               |
| 0.6       | 0.64     | 17   | 0.6         | NSC_14C   | NSC_14C     | NSC_670     | NSC_1405    | 56    |     |            |            |            |            |          | CCN(CC)CC | 14050    | -4        | G150       |             |            |             |            |             | CCCCCIn     | 670390     | 2          | G150        |                                                  |               |
| 0.6       | 0.6      | 18   | 0.6         | NSC_14C   | NSC_14C     | NSC_105     | NSC_1405    | 54    |     |            |            |            |            |          | CCN(CC)CC | 14050    | -4        | G150       |             |            |             |            |             | COc1ccc2C   | 105130     | -4         | G150        | Phenthine antimalarial and antiviral from plants |               |
| 0.6       | 0.62     | 19   | 0.6         | NSC_14C   | NSC_14C     | NSC_645     | NSC_1405    | 65    |     |            |            |            |            |          | CCN(CC)CC | 14050    | -4        | G150       |             |            |             |            |             | Clc1ccc(cc1 | 645033     | -4         | G150        |                                                  |               |
| 0.6       | 0.61     | 20   | 0.6         | NSC_14C   | NSC_14C     | NSC_671     | NSC_1405    | 57    |     |            |            |            |            |          | CCN(CC)CC | 14050    | -4        | G150       |             |            |             |            |             | CCCN1C      | 671765     | -4         | G150        |                                                  |               |
| 0.6       | 0.58     | 21   | 0.6         | NSC_14C   | NSC_14C     | NSC_766     | NSC_1405    | 51    |     |            |            |            |            |          | CCN(CC)CC | 14050    | -4        | G150       |             |            |             |            |             | CC1CCN(C    | 766431     | -4         | G150        |                                                  |               |
| 0.59      | 0.43     | 22   | 0.59        | NSC_14C   | NSC_14C     | NSC_650     | NSC_1405    | 53    |     |            |            |            |            |          | CCN(CC)CC | 14050    | -4        | G150       |             |            |             |            |             | COc1ccc(CN  | 650768     | -4         | G150        |                                                  |               |
| 0.59      | 0.5      | 23   | 0.59        | NSC_14C   | NSC_14C     | NSC_681     | NSC_1405    | 53    |     |            |            |            |            |          | CCN(CC)CC | 14050    | -4        | G150       |             |            |             |            |             | CC1ccc(cc1  | 681083     | -4         | G150        |                                                  |               |
| 0.59      | 0.62     | 24   | 0.59        | NSC_14C   | NSC_14C     | NSC_134     | NSC_1405    | 40    |     |            |            |            |            |          | CCN(CC)CC | 14050    | -4        | G150       |             |            |             |            |             | CCN(CC)CC   | 13484      | -4         | G150        |                                                  |               |
| 0.59      | 0.49     | 25   | 0.59        | NSC_14C   | NSC_14C     | NSC_720     | NSC_1405    | 57    |     |            |            |            |            |          | CCN(CC)CC | 14050    | -4        | G150       |             |            |             |            |             | CN(C)CCNC   | 720486     | -4         | G150        |                                                  |               |
| 0.59      | 0.54     | 26   | 0.59        | NSC_14C   | NSC_14C     | NSC_665     | NSC_1405    | 44    |     |            |            |            |            |          | CCN(CC)CC | 14050    | -4        | G150       |             |            |             |            |             | CN1CCN(C    | 665801     | -4         | G150        |                                                  |               |
| 0.59      | 0.64     | 27   | 0.59        | NSC_14C   | NSC_14C     | NSC_715     | NSC_1405    | 54    |     |            |            |            |            |          | CCN(CC)CC | 14050    | -4        | G150       |             |            |             |            |             | CN12CCc     | 715580     | -4         | G150        |                                                  |               |
| 0.59      | 0.63     | 28   | 0.59        | NSC_14C   | NSC_14C     | NSC_646     | NSC_1405    | 49    |     |            |            |            |            |          | CCN(CC)CC | 14050    | -4        | G150       |             |            |             |            |             | CCN(CC)CC   | 646030     | -4         | G150        |                                                  |               |
| 0.59      | 0.57     | 29   | 0.59        | NSC_14C   | NSC_14C     | NSC_685     | NSC_1405    | 52    |     |            |            |            |            |          | CCN(CC)CC | 14050    | -4        | G150       |             |            |             |            |             | O=C(NCCO    | 685965     | -4         | G150        |                                                  |               |
| 0.59      | 0.76     | 30   | 0.59        | NSC_14C   | NSC_14C     | NSC_854     | NSC_1405    | 52    |     |            |            |            |            |          | CCN(CC)CC | 14050    | -4        | G150       |             |            |             |            |             | CCCCc1oc2   | 85442      | -3.6       | G150        | Amiodarone                                       |               |
| 0.58      | 0.62     | 31   | 0.58        | NSC_14C   | NSC_14C     | NSC_665     | NSC_1405    | 52    |     |            |            |            |            |          | CCN(CC)CC | 14050    | -4        | G150       |             |            |             |            |             | CN(C)C=N    | 665666     | -4         | G150        |                                                  |               |
| 0.58      | 0.47     | 32   | 0.58        | NSC_14C   | NSC_14C     | NSC_652     | NSC_1405    | 45    |     |            |            |            |            |          | CCN(CC)CC | 14050    | -4        | G150       |             |            |             |            |             | NC(=O)N1    | 652807     | -4         | G150        |                                                  |               |
| 0.58      | 0.57     | 33   | 0.58        | NSC_14C   | NSC_14C     | NSC_766     | NSC_1405    | 51    |     |            |            |            |            |          | CCN(CC)CC | 14050    | -4        | G150       |             |            |             |            |             | CCN(C)CC    | 766565     | -4         | G150        |                                                  |               |
| 0.58      | 0.69     | 34   | 0.58        | NSC_14C   | NSC_14C     | NSC_645     | NSC_1405    | 56    |     |            |            |            |            |          | CCN(CC)CC | 14050    | -4        | G150       |             |            |             |            |             | Clc1ccc(cc1 | 645026     | -4         | G150        |                                                  |               |
| 0.58      | 0.63     | 35   | 0.58        | NSC_14C   | NSC_14C     | NSC_633     | NSC_1405    | 55    |     |            |            |            |            |          | CCN(CC)CC | 14050    | -4        | G150       |             |            |             |            |             | Clc1ccc(cc1 | 633413     | -5         | G150        |                                                  |               |
| 0.57      | 0.6      | 36   | 0.57        | NSC_14C   | NSC_14C     | NSC_687     | NSC_1405    | 51    |     |            |            |            |            |          | CCN(CC)CC | 14050    | -4        | G150       |             |            |             |            |             | O=C1N(C)=   | 687032     | -4         | G150        |                                                  |               |
| 0.57      | 0.59     | 37   | 0.57        | NSC_14C   | NSC_14C     | NSC_680     | NSC_1405    | 56    |     |            |            |            |            |          | CCN(CC)CC | 14050    | -4        | G150       |             |            |             |            |             | COc1ccc2    | 680095     | -4         | G150        |                                                  |               |
| 0.57      | 0.65     | 38   | 0.57        | NSC_14C   | NSC_14C     | NSC_146     | NSC_1405    | 56    |     |            |            |            |            |          | CCN(CC)CC | 14050    | -4        | G150       |             |            |             |            |             | COc1ccc(CC  | 146267     | -4         | G150        |                                                  |               |
| 0.57      | 0.6      | 39   | 0.57        | NSC_14C   | NSC_14C     | NSC_766     | NSC_1405    | 54    |     |            |            |            |            |          | CCN(CC)CC | 14050    | -4        | G150       |             |            |             |            |             | COc1ccc2n   | 766603     | -4         | G150        |                                                  |               |
| 0.57      | 0.56     | 40   | 0.57        | NSC_14C   | NSC_14C     | NSC_683     | NSC_1405    | 57    |     |            |            |            |            |          | CCN(CC)CC | 14050    | -4        | G150       |             |            |             |            |             | COc1ccc2    | 683880     | -4         | G150        |                                                  |               |
| 0.57      | 0.59     | 41   | 0.57        | NSC_14C   | NSC_14C     | NSC_703     | NSC_1405    | 56    |     |            |            |            |            |          | CCN(CC)CC | 14050    | -4        | G150       |             |            |             |            |             | COc1ccc2n   | 703163     | -4         | G150        |                                                  |               |
| 0.57      | 0.63     | 42   | 0.57        | NSC_14C   | NSC_14C     | NSC_766     | NSC_1405    | 55    |     |            |            |            |            |          | CCN(CC)CC | 14050    | -4        | G150       |             |            |             |            |             | Fc1ccc(Nc2  | 766055     | -4         | G150        |                                                  |               |
| 0.56      | 0.51     | 43   | 0.56        | NSC_14C   | NSC_14C     | NSC_717     | NSC_1405    | 57    |     |            |            |            |            |          | CCN(CC)CC | 14050    | -4        | G150       |             |            |             |            |             | OCN1CCN     | 717853     | -4         | G150        |                                                  |               |
| 0.56      | 0.39     | 44   | 0.56        | NSC_14C   | NSC_14C     | NSC_654     | NSC_1405    | 50    |     |            |            |            |            |          | CCN(CC)CC | 14050    | -4        | G150       |             |            |             |            |             | CC(C)OC1c   | 654628     | -4         | G150        |                                                  |               |
| 0.56      | 0.33     | 45   | 0.56        | NSC_14C   | NSC_14C     | NSC_654     | NSC_1405    | 50    |     |            |            |            |            |          | CCN(CC)CC | 14050    | -4        | G150       |             |            |             |            |             | CC(C)OC1c   | 654629     | -4         | G150        |                                                  |               |
| 0.56      | 0.43     | 46   | 0.56        | NSC_14C   | NSC_14C     | NSC_717     | NSC_1405    | 57    |     |            |            |            |            |          | CCN(CC)CC | 14050    | -4        | G150       |             |            |             |            |             | Cc1nc2c(nc  | 717851     | -4         | G150        |                                                  |               |
| 0.56      | 0.42     | 47   | 0.56        | NSC_14C   | NSC_14C     | NSC_716     | NSC_1405    | 54    |     |            |            |            |            |          | CCN(CC)CC | 14050    | -4        | G150       |             |            |             |            |             | CSc1ccc(cc  | 716338     | -4         | G150        |                                                  |               |
| 0.56      | 0.61     | 48   | 0.56        | NSC_14C   | NSC_14C     | NSC_736     | NSC_1405    | 54    |     |            |            |            |            |          | CCN(CC)CC | 14050    | -4        | G150       |             |            |             |            |             | O[C@@H]     | 736380     | -4         | G150        |                                                  |               |
| 0.56      | 0.61     | 49   | 0.56        | NSC_14C   | NSC_14C     | NSC_644     | NSC_1405    | 57    |     |            |            |            |            |          | CCN(CC)CC | 14050    | -4        | G150       |             |            |             |            |             | NCCOC1ccc   | 644617     | -4         | G150        |                                                  |               |
| 0.56      | 0.47     | 50   | 0.56        | NSC_14C   | NSC_14C     | NSC_672     | NSC_1405    | 44    |     |            |            |            |            |          | CCN(CC)CC | 14050    | -4        | G150       |             |            |             |            |             | CC1CN=C     | 672014     | -4         | G150        |                                                  |               |
| 0.56      | 0.44     | 51   | 0.56        | NSC_14C   | NSC_14C     | NSC_2       |             |       |     |            |            |            |            |          |           |          |           |            |             |            |             |            |             |             |            |            |             |                                                  |               |





Suppl. Table 4- List of compounds correlated to Lapachol. Highlighted rows indicate drugs that are approved or in clinical development

| pearson's | spearman | rank | correlati | seed ide | target id | seed des | target d | count | co seed | mo seed | ger seed | pro seed | pro seed | mif | Seed SM  | seed nsc | seed logi | seed enc | seed tar | target m | target p | target g | target p | target m | Target S  | target ns | target lo | target er | target target                        |
|-----------|----------|------|-----------|----------|-----------|----------|----------|-------|---------|---------|----------|----------|----------|-----|----------|----------|-----------|----------|----------|----------|----------|----------|----------|----------|-----------|-----------|-----------|-----------|--------------------------------------|
| 0.74      | 0.77     | 1    | 0.74      | NSC_5_1  | NSC_5_6   | NSC_S11  | NSC_S65  | 42    |         |         |          |          |          |     | CC(=C)\C | 11905    | -5        | GIPRCNT  |          |          |          |          |          |          | Cc1nc2C   | 651774    | -4.1      | GI50      | Lapachol                             |
| 0.73      | 0.69     | 2    | 0.73      | NSC_5_1  | NSC_5_1   | NSC_S11  | NSC_S13  | 54    |         |         |          |          |          |     | CC(=C)\C | 11905    | -5        | GIPRCNT  |          |          |          |          |          |          | ClC(=CC   | 136592    | -4        | GI50      |                                      |
| 0.72      | 0.73     | 3    | 0.72      | NSC_5_1  | NSC_5_1   | NSC_S11  | NSC_S12  | 53    |         |         |          |          |          |     | CC(=C)\C | 11905    | -5        | GIPRCNT  |          |          |          |          |          |          | BrC(=CC   | 123511    | -4        | GI50      |                                      |
| 0.71      | 0.72     | 4    | 0.71      | NSC_5_1  | NSC_5_7   | NSC_S11  | NSC_S75  | 56    |         |         |          |          |          |     | CC(=C)\C | 11905    | -5        | GIPRCNT  |          |          |          |          |          |          | FC(F)(F)c | 755423    | -4.3      | GI50      |                                      |
| 0.71      | 0.71     | 5    | 0.71      | NSC_5_1  | NSC_5_7   | NSC_S11  | NSC_S75  | 56    |         |         |          |          |          |     | CC(=C)\C | 11905    | -5        | GIPRCNT  |          |          |          |          |          |          | FC(F)(F)c | 755427    | -4.3      | GI50      |                                      |
| 0.7       | 0.72     | 6    | 0.7       | NSC_5_1  | NSC_5_6   | NSC_S11  | NSC_S65  | 47    |         |         |          |          |          |     | CC(=C)\C | 11905    | -5        | GIPRCNT  |          |          |          |          |          |          | Oc1ccc(\  | 653260    | -4        | GI50      |                                      |
| 0.7       | 0.71     | 7    | 0.7       | NSC_5_1  | NSC_5_7   | NSC_S11  | NSC_S74  | 55    |         |         |          |          |          |     | CC(=C)\C | 11905    | -5        | GIPRCNT  |          |          |          |          |          |          | CCCN1C    | 746351    | -4        | GI50      |                                      |
| 0.7       | 0.72     | 8    | 0.7       | NSC_5_1  | NSC_5_6   | NSC_S11  | NSC_S65  | 43    |         |         |          |          |          |     | CC(=C)\C | 11905    | -5        | GIPRCNT  |          |          |          |          |          |          | Cc1ccc(C  | 651777    | -4        | GI50      |                                      |
| 0.69      | 0.73     | 9    | 0.69      | NSC_5_1  | NSC_5_6   | NSC_S11  | NSC_S66  | 56    |         |         |          |          |          |     | CC(=C)\C | 11905    | -5        | GIPRCNT  |          |          |          |          |          |          | CC(=O)C   | 667545    | -4        | GI50      |                                      |
| 0.69      | 0.7      | 10   | 0.69      | NSC_5_1  | NSC_5_7   | NSC_S11  | NSC_S77  | 54    |         |         |          |          |          |     | CC(=C)\C | 11905    | -5        | GIPRCNT  |          |          |          |          |          |          | O=C(Nc1   | 772887    | -4        | GI50      | JAK                                  |
| 0.69      | 0.73     | 11   | 0.69      | NSC_5_1  | NSC_5_6   | NSC_S11  | NSC_S64  | 47    |         |         |          |          |          |     | CC(=C)\C | 11905    | -5        | GIPRCNT  |          |          |          |          |          |          | CC(C)(c1  | 646240    | -4        | GI50      |                                      |
| 0.69      | 0.72     | 12   | 0.69      | NSC_5_1  | NSC_5_6   | NSC_S11  | NSC_S65  | 43    |         |         |          |          |          |     | CC(=C)\C | 11905    | -5        | GIPRCNT  |          |          |          |          |          |          | COc1ccc   | 651775    | -4.1      | GI50      |                                      |
| 0.68      | 0.67     | 13   | 0.68      | NSC_5_1  | NSC_5_7   | NSC_S11  | NSC_S74  | 53    |         |         |          |          |          |     | CC(=C)\C | 11905    | -5        | GIPRCNT  |          |          |          |          |          |          | O=C(CO)   | 743402    | -4        | GI50      |                                      |
| 0.67      | 0.68     | 14   | 0.67      | NSC_5_1  | NSC_5_7   | NSC_S11  | NSC_S75  | 56    |         |         |          |          |          |     | CC(=C)\C | 11905    | -5        | GIPRCNT  |          |          |          |          |          |          | CCOC(=C   | 755267    | -4        | GI50      |                                      |
| 0.67      | 0.65     | 15   | 0.67      | NSC_5_1  | NSC_5_6   | NSC_S11  | NSC_S67  | 56    |         |         |          |          |          |     | CC(=C)\C | 11905    | -5        | GIPRCNT  |          |          |          |          |          |          | NC1=Nc    | 671319    | -4        | GI50      |                                      |
| 0.67      | 0.68     | 16   | 0.67      | NSC_5_1  | NSC_5_5   | NSC_S11  | NSC_S58  | 55    |         |         |          |          |          |     | CC(=C)\C | 11905    | -5        | GIPRCNT  |          |          |          |          |          |          | C1CCn1c   | 58906     | -4        | GI50      |                                      |
| 0.67      | 0.65     | 17   | 0.67      | NSC_5_1  | NSC_5_1   | NSC_S11  | NSC_S12  | 56    |         |         |          |          |          |     | CC(=C)\C | 11905    | -5        | GIPRCNT  |          |          |          |          |          |          | ClC(=CC   | 126771    | -4        | GI50      |                                      |
| 0.67      | 0.66     | 18   | 0.67      | NSC_5_1  | NSC_5_4   | NSC_S11  | NSC_S44  | 56    |         |         |          |          |          |     | CC(=C)\C | 11905    | -5        | GIPRCNT  |          |          |          |          |          |          | CCCN1cr   | 44580     | -4        | GI50      | Anti virus                           |
| 0.67      | 0.64     | 19   | 0.67      | NSC_5_1  | NSC_5_7   | NSC_S11  | NSC_S74  | 56    |         |         |          |          |          |     | CC(=C)\C | 11905    | -5        | GIPRCNT  |          |          |          |          |          |          | CN(Cc1c   | 740       | -5        | GI50      | Dihydrofolate reductase Methotrexate |
| 0.67      | 0.63     | 20   | 0.67      | NSC_5_1  | NSC_5_7   | NSC_S11  | NSC_S73  | 53    |         |         |          |          |          |     | CC(=C)\C | 11905    | -5        | GIPRCNT  |          |          |          |          |          |          | Cc1cc(Cl  | 736563    | -4        | GI50      |                                      |
| 0.66      | 0.68     | 21   | 0.66      | NSC_5_1  | NSC_5_7   | NSC_S11  | NSC_S73  | 53    |         |         |          |          |          |     | CC(=C)\C | 11905    | -5        | GIPRCNT  |          |          |          |          |          |          | CCOCNc    | 736567    | -4        | GI50      |                                      |
| 0.66      | 0.7      | 22   | 0.66      | NSC_5_1  | NSC_5_6   | NSC_S11  | NSC_S64  | 47    |         |         |          |          |          |     | CC(=C)\C | 11905    | -5        | GIPRCNT  |          |          |          |          |          |          | CC(C)(C)  | 646248    | -4        | GI50      |                                      |
| 0.66      | 0.65     | 23   | 0.66      | NSC_5_1  | NSC_5_7   | NSC_S11  | NSC_S74  | 55    |         |         |          |          |          |     | CC(=C)\C | 11905    | -5        | GIPRCNT  |          |          |          |          |          |          | Cc1nn(c   | 746418    | -4        | GI50      |                                      |
| 0.66      | 0.6      | 24   | 0.66      | NSC_5_1  | NSC_5_6   | NSC_S11  | NSC_S63  | 43    |         |         |          |          |          |     | CC(=C)\C | 11905    | -5        | GIPRCNT  |          |          |          |          |          |          | CC(O)-[T  | 637815    | -4        | GI50      |                                      |
| 0.65      | 0.65     | 25   | 0.65      | NSC_5_1  | NSC_5_7   | NSC_S11  | NSC_S75  | 56    |         |         |          |          |          |     | CC(=C)\C | 11905    | -5        | GIPRCNT  |          |          |          |          |          |          | FC(F)(F)c | 755417    | -4        | GI50      |                                      |
| 0.65      | 0.68     | 26   | 0.65      | NSC_5_1  | NSC_5_7   | NSC_S11  | NSC_S75  | 56    |         |         |          |          |          |     | CC(=C)\C | 11905    | -5        | GIPRCNT  |          |          |          |          |          |          | COC(=O)   | 755265    | -4        | GI50      |                                      |
| 0.65      | 0.69     | 27   | 0.65      | NSC_5_1  | NSC_5_3   | NSC_S11  | NSC_S33  | 55    |         |         |          |          |          |     | CC(=C)\C | 11905    | -5        | GIPRCNT  |          |          |          |          |          |          | Cc1c(nc2  | 339768    | -4        | GI50      |                                      |
| 0.65      | 0.68     | 28   | 0.65      | NSC_5_1  | NSC_5_6   | NSC_S11  | NSC_S67  | 41    |         |         |          |          |          |     | CC(=C)\C | 11905    | -5        | GIPRCNT  |          |          |          |          |          |          | O=S1(=C   | 679042    | -4        | GI50      |                                      |
| 0.65      | 0.66     | 29   | 0.65      | NSC_5_1  | NSC_5_7   | NSC_S11  | NSC_S74  | 55    |         |         |          |          |          |     | CC(=C)\C | 11905    | -5        | GIPRCNT  |          |          |          |          |          |          | CN(C)C1   | 741594    | -4        | GI50      |                                      |
| 0.64      | 0.65     | 30   | 0.64      | NSC_5_1  | NSC_5_1   | NSC_S11  | NSC_S12  | 55    |         |         |          |          |          |     | CC(=C)\C | 11905    | -5        | GIPRCNT  |          |          |          |          |          |          | COc1c(C   | 129185    | -4        | GI50      | mycophenolic acid antiviral          |
| 0.64      | 0.63     | 31   | 0.64      | NSC_5_1  | NSC_5_7   | NSC_S11  | NSC_S75  | 56    |         |         |          |          |          |     | CC(=C)\C | 11905    | -5        | GIPRCNT  |          |          |          |          |          |          | CCOC(=C   | 756662    | -4        | GI50      | Survivan                             |
| 0.64      | 0.61     | 32   | 0.64      | NSC_5_1  | NSC_5_7   | NSC_S11  | NSC_S73  | 56    |         |         |          |          |          |     | CC(=C)\C | 11905    | -5        | GIPRCNT  |          |          |          |          |          |          | COc1cc(\  | 73735     | -4        | GI50      |                                      |
| 0.64      | 0.61     | 33   | 0.64      | NSC_5_1  | NSC_5_6   | NSC_S11  | NSC_S63  | 46    |         |         |          |          |          |     | CC(=C)\C | 11905    | -5        | GIPRCNT  |          |          |          |          |          |          | O=C1Oc    | 638441    | -4        | GI50      |                                      |
| 0.64      | 0.65     | 34   | 0.64      | NSC_5_1  | NSC_5_6   | NSC_S11  | NSC_S63  | 45    |         |         |          |          |          |     | CC(=C)\C | 11905    | -5        | GIPRCNT  |          |          |          |          |          |          | CCN(CC)   | 635922    | -4        | GI50      |                                      |
| 0.64      | 0.63     | 35   | 0.64      | NSC_5_1  | NSC_5_7   | NSC_S11  | NSC_S70  | 56    |         |         |          |          |          |     | CC(=C)\C | 11905    | -5        | GIPRCNT  |          |          |          |          |          |          | COc1ccc   | 707904    | -4        | GI50      |                                      |
| 0.64      | 0.66     | 36   | 0.64      | NSC_5_1  | NSC_5_6   | NSC_S11  | NSC_S62  | 45    |         |         |          |          |          |     | CC(=C)\C | 11905    | -5        | GIPRCNT  |          |          |          |          |          |          | BrC1=CC   | 627687    | -4        | GI50      |                                      |
| 0.64      | 0.61     | 37   | 0.64      | NSC_5_1  | NSC_5_6   | NSC_S11  | NSC_S65  | 55    |         |         |          |          |          |     | CC(=C)\C | 11905    | -5        | GIPRCNT  |          |          |          |          |          |          | COc1ccc   | 655310    | -4        | GI50      |                                      |
| 0.63      | 0.68     | 38   | 0.63      | NSC_5_1  | NSC_5_6   | NSC_S11  | NSC_S64  | 47    |         |         |          |          |          |     | CC(=C)\C | 11905    | -5        | GIPRCNT  |          |          |          |          |          |          | CCOc1cc   | 647120    | -4        | GI50      |                                      |
| 0.63      | 0.62     | 39   | 0.63      | NSC_5_1  | NSC_5_6   | NSC_S11  | NSC_S62  | 42    |         |         |          |          |          |     | CC(=C)\C | 11905    | -5        | GIPRCNT  |          |          |          |          |          |          | COc1ccc   | 624228    | -4        | GI50      |                                      |
| 0.63      | 0.61     | 40   | 0.63      | NSC_5_1  | NSC_5_7   | NSC_S11  | NSC_S75  | 56    |         |         |          |          |          |     | CC(=C)\C | 11905    | -5        | GIPRCNT  |          |          |          |          |          |          | FC(F)(F)c | 755429    | -4        | GI50      |                                      |
| 0.63      | 0.63     | 41   | 0.63      | NSC_5_1  | NSC_5_1   | NSC_S11  | NSC_S14  | 56    |         |         |          |          |          |     | CC(=C)\C | 11905    | -5        | GIPRCNT  |          |          |          |          |          |          | OCC1OC    | 146268    | -4        | GI50      | 2-Thio-6-azauridine antiviral        |
| 0.63      | 0.66     | 42   | 0.63      | NSC_5_1  | NSC_5_6   | NSC_S11  | NSC_S65  | 43    |         |         |          |          |          |     | CC(=C)\C | 11905    | -5        | GIPRCNT  |          |          |          |          |          |          | CC(C)CC   | 651758    | -4        | GI50      |                                      |
| 0.63      | 0.66     | 43   | 0.63      | NSC_5_1  | NSC_5_7   | NSC_S11  | NSC_S72  | 56    |         |         |          |          |          |     | CC(=C)\C | 11905    | -5        | GIPRCNT  |          |          |          |          |          |          | CC1(C)O   | 720529    | -4        | GI50      |                                      |
| 0.62      | 0.63     | 44   | 0.62      | NSC_5_1  | NSC_5_6   | NSC_S11  | NSC_S60  | 55    |         |         |          |          |          |     | CC(=C)\C | 11905    | -5        | GIPRCNT  |          |          |          |          |          |          | OCC1OC    | 603335    | -4        | GI50      |                                      |
| 0.62      | 0.62     | 45   | 0.62      | NSC_5_1  | NSC_5_1   | NSC_S11  | NSC_S11  | 56    |         |         |          |          |          |     | CC(=C)\C | 11905    | -5        | GIPRCNT  |          |          |          |          |          |          | CC(=C)\C  | 11905     | -4        | GI50      |                                      |
| 0.62      | 0.59     | 46   | 0.62      | NSC_5_1  | NSC_5_1   | NSC_S11  | NSC_S12  | 56    |         |         |          |          |          |     | CC(=C)\C | 11905    | -5        | GIPRCNT  |          |          |          |          |          |          | ClC(=CC   | 126771    | -3.6      | GI50      |                                      |
| 0.62      | 0.66     | 47   | 0.62      | NSC_5_1  | NSC_5_6   | NSC_S11  | NSC_S69  | 53    |         |         |          |          |          |     | CC(=C)\C | 11905    | -5        | GIPRCNT  |          |          |          |          |          |          | CN(Cc1c   | 696558    | -4        | GI50      |                                      |
| 0.62      | 0.66     | 48   | 0.62      | NSC_5_1  | NSC_5_7   | NSC_S11  | NSC_S75  | 56    |         |         |          |          |          |     | CC(=C)\C | 11905    | -5        | GIPRCNT  |          |          |          |          |          |          | NCC(=O)   | 756657    | -4        | GI50      | PDK-1                                |
| 0.62      | 0.69     | 49   | 0.62      | NSC_5_1  | NSC_5_6   | NSC_S11  | NSC_S63  | 41    |         |         |          |          |          |     | CC(=C)\C | 11905    | -5        | GIPRCNT  |          |          |          |          |          |          | Cc1cccc   | 636098    | -4        | GI50      |                                      |
| 0.61      | 0.54     | 50   | 0.61      | NSC_5_1  | NSC_5_6   | NSC_S11  | NSC_S68  | 56    |         |         |          |          |          |     | CC(=C)\C | 11905    | -5        | GIPRCNT  |          |          |          |          |          |          |           |           |           |           |                                      |
